# Supplementary material
Source: PubMed Central journal article supplement (PMC5129877)
Supplement: cr201655x2.pdf [file cr201655x2.pdf]

**Supplementary Figure 2 A three-dimensional view on the migration traces of olfactory bulb interneurons within a sample field of view**

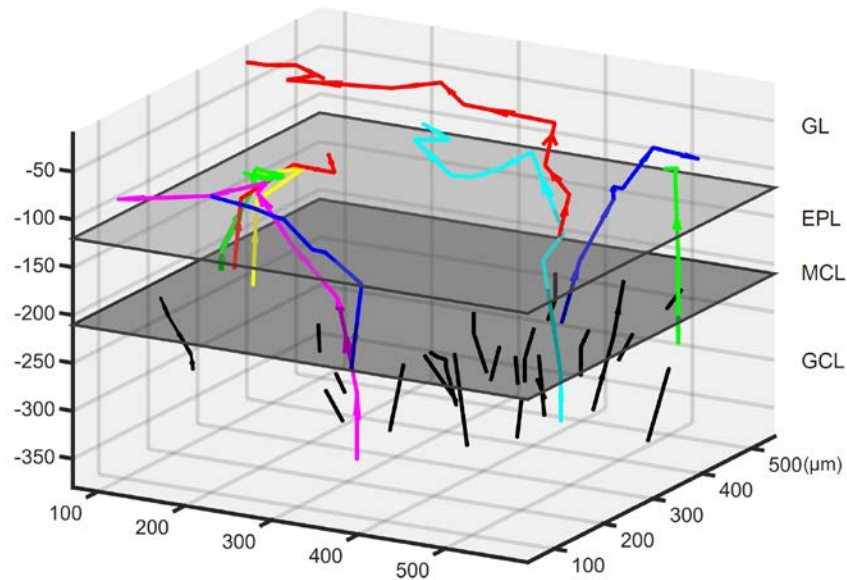

**Supplementary Figure 2** A three-dimensional view on the migration traces of olfactory bulb interneurons within a sample field of view. Migration traces of GCs are shown in black whereas migration traces of individual JGNs are color-coded. Due to the limited number of colors available for 3D plotting, we had to use the same colors for nonoverlapping traces of different juxtglomerular cells.
