# Supplementary material
Source: PubMed Central journal article supplement (PMC5129877)
Supplement: cr201655x3.pdf [file cr201655x3.pdf]

**Supplementary Figure 3 An example migration trace of adult-born JGNs and comparison of methods categorizing the migration mode**

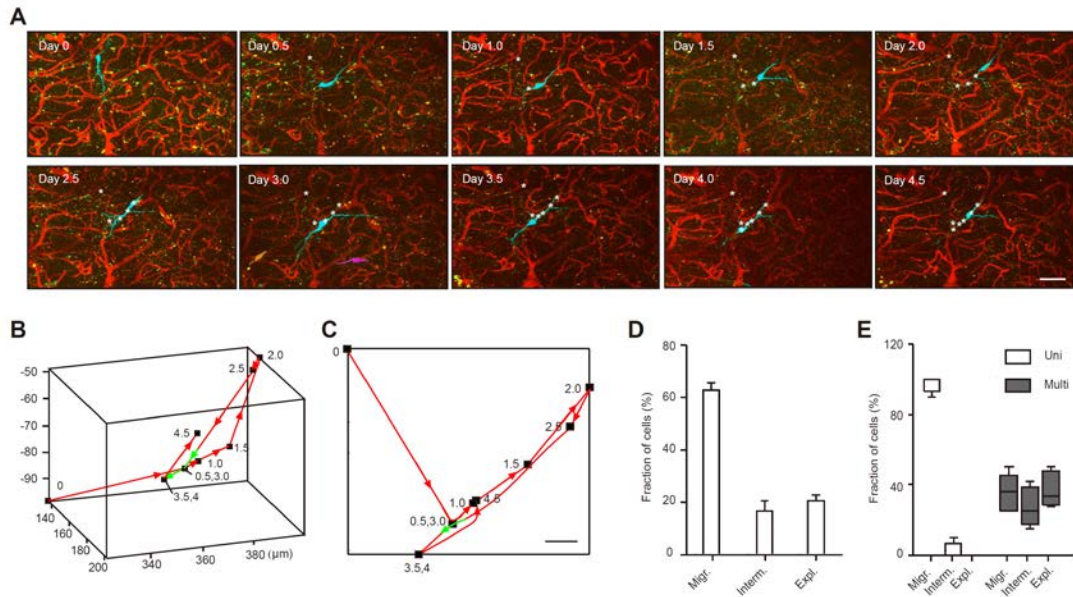

**Supplementary Figure 3** An example migration trace of an adult-born JGN and comparison of methods categorizing the migration mode.

**(A)** A series of MIP images (50-106  $\mu\text{m}$  depth, step 2  $\mu\text{m}$ ) illustrating migration behavior of an adult-born JGN (a Cerulean expressing cell, false-colored in cyan for better visibility). Day 0 was the day when the cell arrived at the GL (corresponding to DPI 6). Asterisks indicate previous positions of the cell. Note that two other cells (a pink one and a yellow one move in and out of the FOV). Scale bar, 50  $\mu\text{m}$ .

**(B, C)** Migration trajectory of the cell shown in **(A)** in 3D **(B)** and X-Y plane **(C)**. Each dot indicates the position of the cell at corresponding time points (days in GL). Green arrows indicate the migration direction of the cell at overlapping positions. Scale bar in **(C)**, 10  $\mu\text{m}$ .

**(D)** Bar graph illustrating the fraction of migratory, intermediate and exploratory cells in our data set ( $n=5$  mice, 15-69 cells per mouse, the same analysis as the one described in ref. [1]). Data are shown as mean  $\pm$  s.e.m.

**(E)** Box plot relating our categorizing method (uni- or multi-directional migration) to the one of Nam *et al.*[1]. Data are shown as median  $\pm$  interquartile range, the same data set as in **(D)**.

**Supplementary references**

1 Nam SC, Kim Y, Dryanovski D et al. Dynamic features of postnatal subventricular zone cell motility: a two-photon time-lapse study. *J Comp Neurol* 2007; 505:190-208.
