# Supplementary material
Source: PubMed Central journal article supplement (PMC5129877)
Supplement: cr201655x5.pdf [file cr201655x5.pdf]

**Supplementary Figure 5 Distribution of migration steps of juxtglomerular neurons**

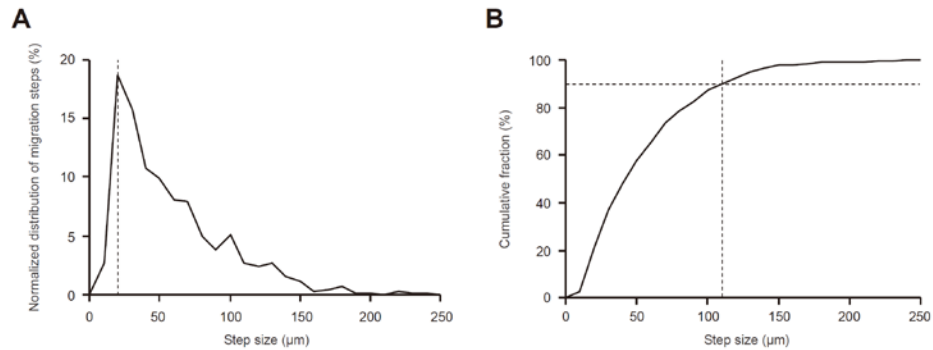

**Supplementary Figure 5** Distribution of migration steps of juxtglomerular neurons.

**(A)** Normalized histogram of all migration steps measured within the GL (n=771 steps, 187 cells).

**(B)** Cumulative histogram of the data shown in **(A)**. Dotted lines help to read out the peak value in **(A)** and the value of 90th percentile in **(B)**.
